# Supplementary material for: Palliative Medicine Referral and End-of-Life Interventions Among Racial and Ethnic Minority Patients With Advanced or Recurrent Gynecologic Cancer
Source: PubMed Central journal article supplement — Cancer Control. 2023 Feb 10;30:10732748231157191. doi: 10.1177/10732748231157191 (PMC9943963; doi:10.1177/10732748231157191), 2023-02-10
Supplement: sj-pdf-1-ccx-10.1177_10732748231157191.pdf [file sj-pdf-1-ccx-10.1177_10732748231157191.pdf]

**Supplementary Table. Variations in patient demographics by completion of palliative care consult.**

| <b>Variable</b>            | <b>Not Seen</b>    | <b>Seen</b> | <b>P Value</b> |       |
|----------------------------|--------------------|-------------|----------------|-------|
| <b>Race</b>                | White              | 5 (33.3%)   | 20 (29.9%)     | 0.766 |
|                            | Black              | 10 (66.7%)  | 47 (70.1%)     |       |
| <b>Age</b>                 | Q1                 | 2 (13%)     | 17 (25.3%)     | 0.408 |
|                            | Q2                 | 2 (13%)     | 16 (23.8%)     |       |
|                            | Q3                 | 4 (27%)     | 17 (25.3%)     |       |
|                            | Q4                 | 7 (47%)     | 17 (25.3%)     |       |
| <b>Language</b>            | English            | 10 (66.7%)  | 51 (76.1%)     | 0.516 |
|                            | Non-English        | 5 (33.3%)   | 16 (23.94%)    |       |
| <b>Organ Site</b>          | Ovary              | 10 (66.7%)  | 21 (31.3%)     | 0.033 |
|                            | Uterus             | 1 (6.7%)    | 21 (31.3%)     |       |
|                            | Cervix / Vulva     | 4 (26.7%)   | 25 (37.3%)     |       |
| <b>Country of Birth</b>    | USA Born           | 0 (0.0%)    | 15 (22.4%)     | 0.104 |
|                            | Foreign            | 4 (26.7%)   | 12 (17.9%)     |       |
|                            | Unknown            | 11 (73.3%)  | 40 (59.7%)     |       |
| <b>Insurance</b>           | Private            | 7 (46.7%)   | 47 (70.1%)     | 0.114 |
|                            | Other              | 8 (53.3%)   | 20 (29.9%)     |       |
| <b>Stage at Diagnosis</b>  | I                  | 1 (6.7%)    | 6 (9.0%)       | 0.545 |
|                            | II                 | 1 (6.7%)    | 12 (17.9%)     |       |
|                            | III                | 9 (60.0%)   | 26 (38.8%)     |       |
|                            | IV                 | 4 (26.7%)   | 23 (34.3%)     |       |
| <b>Reason for Referral</b> | Symptom Management | 11 (73.3%)  | 49 (73.1%)     | 0.222 |
|                            | Other              | 4 (26.7%)   | 18 (26.9%)     |       |
